RESEARCH ARTICLE

# Circulation of *Herpesvirus* and *Alphatorquevirus* DNA in each trimester in asymptomatic women pregnant with twins

Tania Regina Tozetto-Mendoza<sup>1\*</sup>, Layla Honorato<sup>1</sup>, Mariane Pereira Brito<sup>1</sup>, Noely Evangelista Ferreira<sup>1</sup>, Iara M. Linhares<sup>2</sup>, Angela Silvano<sup>3</sup>, Antonio Charlys da Costa<sup>1</sup>, Silvia Helena Lima<sup>1</sup>, Viola Seravalli<sup>3</sup>, Mariarosaria Di Tommaso<sup>3†</sup>, Maria Cassia Mendes-Correa<sup>1†</sup>, Steven S. Witkin<sup>1,4†</sup>

**1** Laboratory of Virology (LIM 52), Department of Infectious Diseases and Tropical Medicine, Instituto de Medicina Tropical de São Paulo, Medical School, University of São Paulo, São Paulo, Brazil,

**2** Department of Gynecology and Obstetrics, University of São Paulo Medical School, São Paulo, Brazil,

**3** Division of Obstetrics and Gynecology, Department of Health Sciences, Careggi Hospital, University of Florence, Florence, Italy, **4** Department of Obstetrics and Gynecology, Weill Cornell Medicine, New York, New York, United States of America

† These authors jointly supervised this work.

\* [tozetto@usp.br](mailto:tozetto@usp.br)

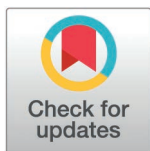

## OPEN ACCESS

**Citation:** Tozetto-Mendoza TR, Honorato L, Brito MP, Ferreira NE, Linhares IM, Silvano A, et al. (2025) Circulation of *Herpesvirus* and *Alphatorquevirus* DNA in each trimester in asymptomatic women pregnant with twins. PLoS One 20(11): e0335200. <https://doi.org/10.1371/journal.pone.0335200>

**Editor:** Simone Agostini, Fondazione Don Carlo Gnocchi, ITALY

**Received:** June 18, 2025

**Accepted:** October 7, 2025

**Published:** November 14, 2025

**Peer Review History:** PLOS recognizes the benefits of transparency in the peer review process; therefore, we enable the publication of all of the content of peer review and author responses alongside final, published articles. The editorial history of this article is available here: <https://doi.org/10.1371/journal.pone.0335200>

**Copyright:** © 2025 Tozetto-Mendoza et al. This is an open access article distributed under the terms of the [Creative Commons Attribution License](https://creativecommons.org/licenses/by/4.0/), which permits unrestricted use,

## Abstract

### Background

Data on the dynamics of Herpesviruses and Torque teno virus (TTV) in plasma from twin pregnancies are limited, despite their potential to provide insights into maternal immune status in this high-risk population.

### Methods

A convenience sample of plasma was obtained from 54 healthy women with twin pregnancies and no adverse outcomes. The plasma samples were collected at 8–15, 17–25, and 26–35 weeks of gestation at Careggi University Hospital, Florence, Italy. Real-time PCR detected Herpesviruses and TTV DNA, determined viral titers, and evaluated associations with cytokine levels and pregnancy-related parameters.

### Results

Herpesvirus were detected in 10 women (18.5%): three for herpes simplex virus (HSV)-1, three for human herpesvirus (HHV)-6, one for both HSV-1 and HHV-6, and one each for HSV-2, cytomegalovirus (CMV), or Epstein–Barr virus (EBV). Only one woman was positive throughout all trimesters (HHV-6). TTV DNA was detected in 42 women (77.7%), persistently in 26 (48.1%) and transiently in 16 (29.6%). No associations were found between viral detection and plasma interleukin (IL)-1 $\beta$ , IL-6, tumor necrosis factor- $\alpha$  (TNF- $\alpha$ ), or pregnancy-related parameters, except for a higher prevalence of TTV in women with previous deliveries ( $p = 0.0402$ ).

distribution, and reproduction in any medium, provided the original author and source are credited.

**Data availability statement:** All relevant data are within the manuscript and its [Supporting information](#) files.

**Funding:** The support for the laboratorial investigation was provided by the Laboratory of Medical Investigation (LIM) 52, Faculty of Medicine, University of São Paulo, Brazil.

**Competing interests:** The authors declare that they have no known competing financial interests or personal relationships that could have appeared to influence the work reported in this paper.

## Conclusion

The high frequency and variable viral titer of TTV with the transient circulation of some herpesviruses appear unaffected by the immunological adaptations inherent to this setting of twin pregnancies without adverse outcomes, as supported by the absence of correlation between inflammatory markers and viral dynamics. Nonetheless, ongoing monitoring of obstetric and postnatal outcomes remains warranted.

## Introduction

Torque teno virus (TTV) and herpesviruses DNA in maternal plasma from twin pregnancies remain largely unexplored, despite their potential to reveal key aspects of maternal immune status.

TTV is an *Alphatorquevirus* and belongs to the *Anelloviridae* family. It is often considered nonpathogenic and is detectable in multiple body fluids [1]. Its replication is thought to occur in activated T lymphocytes [2], and fluctuations in its plasma have been proposed as a biomarker of immune competence [3], particularly in the context of immunosuppression following transplantation [4,5] or during chronic infections [6,7]. In pregnancy, few studies have addressed the role or clinical relevance of TTV [8–12]. In general, TTV is a prevalent commensal virus in pregnant women, with its detection and titer reflecting local and systemic immune status, vaginal microbiome composition, and possibly reproductive outcomes. Its increased presence and titer may serve as a potential surrogate marker for immune status, CD4 level in variable clinical conditions [11–14]. A recent investigation reported a high prevalence of TTV in maternal plasma, with detection rates exceeding 75% during the second and third trimesters [9,10]. Additionally, other studies have linked vaginal TTV levels to bacterial composition and mucosal immune activity [11,12].

Members of the *Herpesviridae* family, herpes simplex virus (HSV) –1 and –2, cytomegalovirus (CMV), human herpes virus (HHV)-6, –7 and –8, Epstein Barr virus (EBV) and varicella zoster virus (VZV)—establish lifelong latency following primary infection [15]. Under conditions of immune modulation, these viruses may intermittently reactivate and replicate their DNA, particularly HSV-1 and CMV, which are strongly associated with perinatal or congenital infection and an increased risk of adverse pregnancy outcomes [16–20].

Twin pregnancies present a distinct immunological milieu compared to singleton gestations, with increased antigenic load and greater placental mass, requiring finely tuned adaptations to support fetal tolerance, placental development and protection against infection. On the other hand, twin gestations may increase susceptibility to immune-mediated complications and alter responses to viral infections [21–23]. Additionally, measurable immunological changes during gestational progression, such as elevated circulating concentrations of IL-6, TNF- $\alpha$ , and IL-1 $\beta$  across all trimesters, have been reported in twin pregnancies [24]. Given these immunological complexities, and the fact that the prevalence of twin pregnancies has steadily increased in

recent decades due to assisted reproductive technologies and delayed maternal childbearing, this population represents a previously rare and understudied setting.

To our knowledge, no study has longitudinally assessed the presence of circulating TTV and herpesviruses across all three trimesters in women with uncomplicated twin pregnancies. This study provides the first longitudinal quantification of TTV and herpesvirus in maternal plasma and examines their inflammatory correlates, offering novel insights into viral dynamics during twin pregnancies.

## Materials and methods

### 1.1. Women with twin pregnancies

Participants in this investigation were women pregnant with twins who were seen at Careggi University Hospital in Florence, Italy between January 2018 and February 2022. Exclusion criteria included a symptomatic maternal infection as determined by the woman's clinician, presence of a fetal anomaly, pregestational diabetes, use of a cervical cerclage to prevent premature delivery or loss of follow-up from antenatal care.

This study included a convenience sample of 54 asymptomatic healthy women without adverse clinical outcomes, with plasma samples available across all three trimesters of pregnancy, including both spontaneous and ART-conceived pregnancies, as well as dichorionic and monochorionic pregnancies. In our cohort, there were no cases of chronic comorbidities or pregestational diabetes, and no cases of twin-to-twin transfusion syndrome (TTTS) were observed. Moreover, there were no suspected cases of maternal infection, as determined by the absence of clinical symptoms in mothers or newborns. The median age at sampling was 35 years (IQR: 33–38), with values ranging from 26 to 46 years.

Gestational age in spontaneous conceptions was calculated from the last menstrual period and confirmed by the fetal crown-rump length measurement from a first trimester ultrasound. In pregnancies conceived by assisted reproductive technologies (ART) embryonic age was determined from the time of fertilization. Reasons for ART included occluded Fallopian tubes, anovulation or inadequate sperm parameters in the male partner. ART included *in vitro* fertilization or intracytoplasmic sperm injection utilizing either autologous or donor oocytes.

Blood samples were collected from each woman at three time points: 8–15 weeks, 17–26 weeks and 27–35 weeks of gestation. Blood processing and measurement for the pro-inflammatory cytokines interleukin (IL) –1 $\beta$ , IL-6 and tumor necrosis factor- $\alpha$  in these women have been previously described in twin pregnant women and showed significant increase levels across the trimesters of gestations [24].

All women provided written informed consent before inclusion. The study was approved by the Ethical Committee of Azienda Ospedaliero-Universitaria Careggi (Ref. no.10255/2017).

### 1.2. DNA extraction and quality control

Total nucleic acids were extracted and purified from 200  $\mu$ L of plasma using a magnetic bead- based automated system (Extracta® Kit – DNA and RNA Viral, MVXA-PV96-B FAST, Locus, Cotia, São Paulo, Brazil) on the Extract platform (Locus, Brazil), following the manufacturer's protocol. The final elution volume of purified nucleic acids was 100  $\mu$ L. DNA quality and the absence of PCR inhibitors were assessed by amplification of an internal control targeting the human Ribonuclease P gene, using primers and probe as previously described [24,25]. All samples were deemed suitable for downstream DNA analysis as evidenced by successful amplification of the control.

### 1.3. Viral detection and quantification

Quantitative real-time PCR (qPCR) assays were performed using hydrolysis probes labeled at the 5' end with FAM, VIC, or NED reporter dyes and a 3' MGB-NFQ quencher. Oligonucleotide primers and probes were synthesized by Integrated DNA Technologies (IDT, USA), based on previously published sequences for the genus *Alphatorquetenovirus* [26,27] and

subfamilies *Alphaherpesvirinae* [28,29], *Betaherpesvirinae* [30,31] and *Gammapherpesvirinae* [32,33]. Oligonucleotide sequences of synthetic curves for the herpesviruses quantitative real-time PCR are delineated in supplementary Table S1 in [S1 File](#).

Reactions were performed using TaqMan® Universal PCR Master Mix (Thermo Fisher Scientific, Warrington, UK) in a final volume of 25 µL, containing 100 ng of DNA template. Final concentrations were 200 nM for primers and 62 nM for probes. Amplification was carried out on a QuantStudio™ 5 Real-Time PCR System (Thermo Fisher Scientific, Warrington, UK) under the following cycling conditions: 50°C for 2 minutes, 95°C for 15 seconds, followed by 50 cycles of 95°C for 15 seconds and 60°C for 1 minute. Absolute quantification of viral DNA was achieved using a standard curve generated from synthetic DNA templates corresponding to each target viral region. The sequences of these templates were synthesized and HPLC-purified by Exxtend Biotecnologia Ltda (São Paulo, Brazil), reconstituted in TE buffer (10 mM Tris-HCl, 0.1 mM EDTA, pH 8.0) at a concentration of 100 µM and serially diluted 10-fold in nuclease-free water. Standard curve generation followed previously established protocols [27,34]. Data were analyzed using QuantStudio Design & Analysis Software v1.4.1. The lower limit of detection (LoD ≥ 95%) varied from 1.4 to 2.0 log<sub>10</sub> copies/mL: TTV (1.6 log<sub>10</sub> copies/mL), HSV-1 and HHV-8 (1.7 log<sub>10</sub> copies/mL), HSV-2 and HHV-6 (1.4 log<sub>10</sub> copies/mL), VZV and HHV-7 (1.9 log<sub>10</sub> copies/mL), EBV (1.5 log<sub>10</sub> copies/mL) and CMV (2.0 log<sub>10</sub> copies/mL).

## 1.4. Statistics

Continuous variables were assessed for normality using the Shapiro-Wilk test. Comparisons were performed using one-way ANOVA or the Kruskal-Wallis test for multiple groups, and the Mann-Whitney test, as appropriate. Spearman's rank correlation was used to evaluate the relationship between TTV titers (log<sub>10</sub> copies per ml), maternal age and the concentrations of IL-1β, IL-6, and TNF-α during each trimester of pregnancy. Categorical variables were analyzed using Fisher's exact test or the Chi-square test, as appropriate. A p-value < 0.05 was considered statistically significant. All analyses were performed using GraphPad Prism version 10 (San Diego, CA).

## Results

### 2.1. Herpesviruses and TTV DNA detection and titer in twin pregnancies

Detection and titer of herpesviruses DNA and the number of women positive for the individual viruses in each trimester are shown in [Table 1](#). Ten of the 54 women (18.5%) were virus DNA positive: one for both HSV-1 and HHV-6, three for only HSV-1, three for only HHV-6, and one each for only HSV-2, CMV and EBV. All samples were DNA negative for VZV and

**Table 1. Herpesviruses DNA titer in plasma of women with twin pregnancies.**

| DNA herpes | Number of positive tests | 1 <sup>st</sup> Trimester<br>n total<br>(median titer)* | 2 <sup>nd</sup> Trimester<br>n total<br>(median titer) | 3 <sup>rd</sup> Trimester<br>n total<br>(median titer) |
|------------|--------------------------|---------------------------------------------------------|--------------------------------------------------------|--------------------------------------------------------|
| HSV-1      | 4                        | 1 (4.12)                                                | 1 (3.93)                                               | 2 (3.81, 4.02)                                         |
| HSV-2      | 1                        | 0 (0)                                                   | 0 (0)                                                  | 1 (3.60)                                               |
| VZV        | 0                        | 0                                                       | 0                                                      | 0                                                      |
| EBV        | 1                        | 0 (0)                                                   | 1 (3.49)                                               | 0 (0)                                                  |
| CMV        | 1                        | 0 (0)                                                   | 1 (3.42)                                               | 0 (0)                                                  |
| HHV-6      | 7                        | 4 (3.20, 3.35, 4.55, 4.61)                              | 2 (3.41, 4.73)                                         | 1 (4.21)                                               |
| HHV-7      | 0                        | 0                                                       | 0                                                      | 0                                                      |
| HHV-8      | 0                        | 0                                                       | 0                                                      | 0                                                      |

\*median titer in copies/ml, n = number of positive DNA tests; n = number of positive DNA tests.

<https://doi.org/10.1371/journal.pone.0335200.t001>

HHV-8. Most of the viruses were detected only transiently during one or two of the trimesters of pregnancy. There was no apparent difference in the number of virus-positive women by trimester. Five women each were herpesvirus DNA positive in the first or the second trimester while four were positive in the third trimester. Only one woman was virus DNA positive for HHV-6 during her entire gestation. No significant differences were observed across the trimesters of twin pregnancy (Table 1). The supplementary Figure 1S in S1 File presents the titer of detected viruses across all trimesters.

The frequencies of TTV DNA were 68.5% (37 women), 59.3% (32), and 61.1% (33) in the first, second, and third trimesters, respectively ( $p=0.5736$ ). TTV DNA was detected in 42 (77.7%) of 54 women. Unlike the situation with herpesviruses, TTV was present in all three trimesters in 25 women (46.3%). Eight women (14.8%) were TTV DNA positive in only one trimester while an additional eight (14.8%) were TTV DNA positive in two trimesters. Median TTV titer was 5.29 (range: 2.58–7.53)  $\log_{10}$  copies/mL. Titers did not differ significantly between trimesters of twin pregnancy ( $p=0.2246$ ).

## 2.2. Viruses DNA detection in relation to pregnancy parameters

Pregnancy-related parameters in women positive or negative for DNA of herpesvirus or TTV are presented in Table 2. There was no association between the presence of herpesviruses or TTV and any pregnancy outcome parameter, such as premature preterm rupture of membranes, preterm delivery, gestational age at delivery or birthweight of the first and second twin. Similarly, maternal historical parameters, such as maternal age, European residency, history of spontaneous or induced abortions, history of preterm birth and body mass index were similar in all groups. Lastly, developments related to the index pregnancy, such as conception by ART, use of donor oocytes, development of gestational diabetes mellitus, hypertension or anemia, were also unaffected by the presence of either virus family. Similar results were obtained when comparing only women positive for HHV-6 or HSV-1 vs. virus negative women. The only significant difference noted was

**Table 2. Characteristics of women with twin pregnancy in relation to viral status.**

| Parameter                         | Herpesvirus positive (n=10) | Herpesvirus negative (n=44) | TTV positive (n=42) | TTV negative (n=12)   |
|-----------------------------------|-----------------------------|-----------------------------|---------------------|-----------------------|
| Mean age (years, SD)              | 34.9 (4.2)                  | 35.6 (4.2)                  | 35.3 (4.3)          | 36.1 (4.1)            |
| European origin                   | 9 (90%)                     | 42 (95.5%)                  | 38 (92.7%)          | 12 (100%)             |
| *Parity                           |                             |                             |                     |                       |
| 0                                 | 6 (60%)                     | 30 (68.2%)                  | 25 (59.5%)          | 11 (91.6%)            |
| > 1                               | 4 (40%)                     | 14 (31.8%)                  | 17 (40.5%)          | 1 (8.3%) <sup>a</sup> |
| Spontaneous abortions             | 1 (10%)                     | 10 (22.7%)                  | 10 (24.4%)          | 1 (7.7%)              |
| Induced abortions                 | 0                           | 7 (15.9%)                   | 5 (12.2%)           | 2 (15.4%)             |
| Mean BMI (kg/m <sup>2</sup> , SD) | 21.5 (2.8)                  | 20.9 (4.8)                  | 21.0 (4.0)          | 21.2 (5.5)            |
| ART conception                    | 3 (30%)                     | 15 (34.1%)                  | 13 (31.7%)          | 5 (38.5%)             |
| Donor oocyte                      | 2 (20%)                     | 4 (9.1%)                    | 4 (9.8%)            | 2 (15.4%)             |
| Previous PTB                      | 0                           | 0                           | 0                   | 0                     |
| Anemia                            | 2 (20%)                     | 16 (36.4%)                  | 15 (36.6%)          | 3 (23.1%)             |
| Pregnancy hypertension            | 1 (10%)                     | 1 (2.3%)                    | 2 (4.9%)            | 0                     |
| GDM                               | 2 (20%)                     | 13 (29.5%)                  | 14 (34.1%)          | 1 (7.7%)              |
| PPROM                             | 2 (20%)                     | 5 (11.4%)                   | 5 (12.2%)           | 2 (15.4%)             |
| Mean GA at delivery (wks, SD)     | 35.8 (1.1)                  | 36.1 (1.6)                  | 36.0 (1.4)          | 36.0 (1.9)            |
| Preterm birth <37 wks             | 8 (80%)                     | 26 (59.1%)                  | 27 (65.9%)          | 7 (53.8%)             |
| Mean birthweight 1st twin (g, SD) | 2271 (306)                  | 2287 (396)                  | 2311 (343)          | 2201 (483)            |
| Mean birthweight 2nd twin (g, SD) | 2283 (338)                  | 2393 (585)                  | 2372 (375)          | 2376 (398)            |

BMI, body mass index; ART, assisted reproductive technology; PTB, preterm birth; GDM, gestational diabetes mellitus; PPRM, preterm premature rupture of membranes; GA, gestational age; bwt, birthweight; wks, weeks. <sup>a</sup> $p=0.0438$  vs TTV positive.

<https://doi.org/10.1371/journal.pone.0335200.t002>

that women positive for TTV were more likely to have had a previous delivery as opposed to women negative for this virus ( $p=0.0438$ ). Maternal age did not show a significant correlation with TTV viral load across the three trimesters (Spearman  $r=-0.021$ ,  $0.020$ , and  $-0.115$  for the first, second, and third trimesters, respectively; 95% CI:  $-0.2971$  to  $0.2584$ ,  $-0.2593$  to  $0.2963$ ,  $-0.3811$  to  $0.1678$ ;  $p=0.882$ ,  $0.887$ ,  $0.411$ ).

### 2.3. Cytokines and viruses DNA detection

Data on cytokine level in each trimester in relation to the viral load and virus-positive or negative for herpesviruses or TTV DNA are shown in Supplementary tables (Tables S1 and S2 in [S1 File](#)). Plasma concentrations of IL-1 $\beta$ , TNF- $\alpha$  and IL-6 did not differ between women testing herpesvirus-positive or virus-negative DNA in any trimester (Table S1 in [S1 File](#)), as well as there was no statistically significant correlation between TTV titer and cytokines level in any trimester (Table S3 in [S1 File](#)). Comparable findings were observed when restricting the analysis to HHV-6- or HSV-1-positive women.

## Discussion

The present investigation, conducted on a rare cohort of twin pregnancies without adverse clinical outcomes, documents longitudinal evidence of the transient presence of herpesviruses and TTV DNA in maternal plasma. Our findings demonstrate that these viral dynamics occur independently of cytokine fluctuations across trimesters in women with twin gestations. This observation extends and reinforces previous reports in singleton pregnancies [\[9,35,36\]](#).

The interpretation of herpesvirus DNA detection in maternal plasma remains complex, as these viruses establish lifelong latency and can reactivate under various physiological conditions, especially during periods of hormonal and immunological shifts, such as those occurring in pregnancy [\[37\]](#). Previous studies reported herpesvirus DNA can be intermittently detected in plasma from pregnant women without clinical consequences [\[35,36,38\]](#). While the presence of this viral DNA does not definitively indicate ongoing lytic replication, it may reflect low-level viral activity, transient shedding from a latent reservoir, or even residual DNA from a past lytic event. Regardless of the precise biological interpretation, the detection of these viruses in plasma is clinically important during pregnancy, as it demands a careful assessment of potential vertical transmission risks and suggests that sustained maternal and neonatal monitoring is warranted.

Although our cohort was composed of healthy pregnant women without adverse clinical outcomes, it is crucial to recognize that the intermittent replication of viruses such as HSV-1 and CMV, for example, has been strongly correlated with an increased risk of perinatal or congenital infections [\[18–20\]](#). In addition, twin gestations impose distinct immunological challenges and may be associated with a potential risk of adverse outcomes compared to singleton gestations [\[39\]](#).

In this context, HHV-6 DNA was the most frequently detected herpesvirus (in variable titers) in these pregnant women. Only one woman in our cohort was persistently HHV-6 DNA-positive across all three trimesters. She was a 36-year-old, white woman of European origin with a body mass index of 21.5, no prior pregnancies, and a spontaneous conception resulting in the delivery of healthy female and male infants at 37.1 weeks gestation. HHV-6 DNA was detected in 7.4% of this cohort of twin pregnancies without any adverse clinical outcomes, a proportion exceeding the 0.4–2.9% reported in the general population [\[40\]](#). Although this finding suggests that HHV-6 detection does not invariably lead to adverse events, the potential for reactivation or congenital infection, including cases associated with inherited chromosomally integrated HHV-6, warrants attention given previously reported risks [\[9,38,41–46\]](#).

TTV DNA was frequently detected in maternal plasma across all trimesters of twin pregnancies, consistent with its ubiquitous distribution [\[10,47\]](#). No correlation was observed between TTV or herpesvirus DNA dynamics and pro-inflammatory plasma markers, likely reflecting the distinct clinical status of healthy women pregnant with twins who delivered at term and the exclusion of women with detectable adverse health parameters. Nonetheless, TTV remains of interest as a potential marker of local immune status of pregnancy [\[15\]](#), preterm birth [\[38\]](#) and labor-related events [\[10,47\]](#).

For instance, a significantly higher detection of anelloviruses in maternal serum of women experiencing spontaneous labor has been reported [10,47], suggesting a potential role in labor-associated inflammatory signaling. Similarly, TTV has been identified as the predominant component of the maternal plasma virome and an association with preterm birth risk has been reported [38].

In addition, the presence of TTV DNA in the maternal circulation was significantly more frequent in women with a history of prior pregnancy and delivery as opposed to women negative for this virus. The composition of the vaginal microbiome in women with a prior pregnancy differs from that of nulliparous women [28] and this likely is a consequence of pregnancy-induced immune system alterations that persist postpartum. Studies have shown that parity can significantly alter the vaginal microbiome [38,43], potentially influencing susceptibility to viral persistence or reactivation. Thus, a potential explanation for the present observation, as previously suggested [10], is that quantitative alterations in the immune system occur as a consequence of pregnancy and that these changes result in an elevated likelihood of persistent TTV colonization. This finding that the detection of TTV in the circulation of pregnant women varies with parity is a pertinent variable that must be taken into consideration in investigations evaluating the presence of TTV as an immune marker of gestational disturbance.

Consistent with our findings, TTV has been detected in a substantial proportion of asymptomatic pregnant women who delivered at term [10]. However, unlike our plasma-based results, that study identified elevated concentrations of IL-6 and IL-8 in TTV positive vaginal samples, suggesting localized immune activation. These differences may reflect variation in sample type, anatomical site, or immune environment. The presence of TTV in vaginal fluid may indicate mucosal immune modulation, raising the possibility that TTV interacts differently with local and systemic immunity during pregnancy. Interestingly, even in a cohort that included preterm births, a prior study did not find an association between *Alphatorquetenovirus* detection in maternal blood and inflammatory complications such as preterm labor, histologic chorioamnionitis or preeclampsia [35]. Their findings, derived from a clinically vulnerable population, are consistent with ours and further suggest that the mere presence of TTV alone may not indicate a pathological state.

Limitations of the present study need to be acknowledged. The small number of study participants was a consequence of the relative rarity in our population of the availability for analysis of samples from each trimester in women with twin pregnancies. Additional studies on larger populations and from different geographical locations are needed to obtain more accurate results. Furthermore, there were no attempts to culture any of the herpesvirus positive samples, so we were unable to ascertain whether there was replicative virus present in any of the women. Another limitation is that pregnant women in our cohort were not routinely tested for antibodies to herpesviruses, alterations in the vaginal microbiome or for genital tract immune status. The only testing was for antibodies to rubella, hepatitis B virus s antigen, and hepatitis C virus. Thus, we could not determine the level of preexisting immunity to any of the viruses identified in the present study. It should be noted that none of the newborns had a fever the first few days after delivery. Moreover, our longitudinal design, with sampling in all three trimesters, allowed us to distinguish sustained from isolated virus detection – revealing a predominantly transient pattern without inflammatory correlates.

However, the detection of herpesviruses DNA in the circulation at one or two time points during gestation in women with twin pregnancies does not necessarily indicate the presence of an active infection nor predict the occurrence of a subsequent adverse pregnancy outcome. Similarly, TTV occurrence is common in women with uneventful twin pregnancies and its prevalence varies with parity, highlighting the importance of host-related factors in interpreting viral detection during pregnancy.

In conclusion, in twin pregnancies without adverse outcomes, the high frequency and variable viral titer of TTV and the transient circulation of herpesviruses in maternal plasma appear unaffected by the immunological adaptations inherent to this setting, as supported by the absence of correlation between inflammatory markers and viral dynamics. Nonetheless, ongoing viral monitoring of obstetric and associations with postnatal outcomes remain warranted.

## Supporting information

**S1 File. Supplementary information file.** This file contains all supplementary figures and tables. (DOCX)

## Acknowledgments

We gratefully acknowledge the contributions of the researchers and staff from Careggi University Hospital, Florence, Italy, and the Virology Laboratory of the Institute of Tropical Medicine, Faculty of Medicine, University of São Paulo, Brazil, for their essential support and collaboration.

## Author contributions

**Conceptualization:** Maria Cassia Mendes-Correa, Steven S. Witkin.

**Formal analysis:** Tania Regina Tozetto-Mendoza, Layla Honorato, Maria Cassia Mendes-Correa, Steven S. Witkin.

**Investigation:** Tania Regina Tozetto-Mendoza, Mariane Pereira Brito, Noely Evangelista Ferreira, Angela Silvano, Antonio Charlys da Costa, Silvia Helena Lima, Viola Seravalli.

**Methodology:** Tania Regina Tozetto-Mendoza, Layla Honorato, Mariane Pereira Brito, Noely Evangelista Ferreira, Antonio Charlys da Costa, Silvia Helena Lima, Mariarosaria Di Tommaso.

**Project administration:** Maria Cassia Mendes-Correa.

**Supervision:** Maria Cassia Mendes-Correa, Steven S. Witkin.

**Writing – original draft:** Steven S. Witkin.

**Writing – review & editing:** Tania Regina Tozetto-Mendoza, Layla Honorato, Iara M. Linhares, Angela Silvano, Antonio Charlys da Costa, Mariarosaria Di Tommaso, Maria Cassia Mendes-Correa, Steven S. Witkin.

## References

1. Biagini P. Classification of TTV and related viruses (anelloviruses). *Curr Top Microbiol Immunol*. 2009;331:21–33. [https://doi.org/10.1007/978-3-540-70972-5\\_2](https://doi.org/10.1007/978-3-540-70972-5_2) PMID: 19230555
2. Mariscal LF, López-Alcorocho JM, Rodríguez-Iñigo E, Ortiz-Movilla N, de Lucas S, Bartolomé J, et al. TT virus replicates in stimulated but not in nonstimulated peripheral blood mononuclear cells. *Virology*. 2002;301(1):121–9. <https://doi.org/10.1006/viro.2002.1545> PMID: 12359452
3. Tozetto-Mendoza TR, Braz-Silva PH, Gianecchini S, Witkin SS. Editorial: Torquetenovirus: predictive biomarker or innocent bystander in pathogenesis. *Front Med (Lausanne)*. 2023;10:1283454. <https://doi.org/10.3389/fmed.2023.1283454> PMID: 37828938
4. Pradier A, Masouridi-Levrat S, Bosshard C, Dantin C, Vu D-L, Zanella M-C, et al. Torque Teno Virus as a Potential Biomarker for Complications and Survival After Allogeneic Hematopoietic Stem Cell Transplantation. *Front Immunol*. 2020;11:998. <https://doi.org/10.3389/fimmu.2020.00998> PMID: 32536920
5. Focosi D, Macera L, Pistello M, Maggi F. Torque Teno virus viremia correlates with intensity of maintenance immunosuppression in adult orthotopic liver transplant. *J Infect Dis*. 2014;210(4):667–8. <https://doi.org/10.1093/infdis/jiu209> PMID: 24688076
6. Mrzljak A, Vilibic-Cavlek T. Torque teno virus in liver diseases and after liver transplantation. *World J Transplant*. 2020;10(11):291–6. <https://doi.org/10.5500/wjt.v10.i11.291> PMID: 33312890
7. Debiaggi M, Zara F, Sacchi P, Bruno R, Mazzucco M, Poma R, et al. Transfusion-transmitted virus infection in HIV-1-seropositive patients. *Clin Microbiol Infect*. 2000;6(5):246–50. <https://doi.org/10.1046/j.1469-0691.2000.00069.x> PMID: 11168120
8. Brani P, Manzoor HZ, Spezia PG, Vigezzi A, Ietto G, Dalla Gasperina D, et al. Torque Teno Virus: Lights and Shades. *Viruses*. 2025;17(3):334. <https://doi.org/10.3390/v17030334> PMID: 40143262
9. Stout MJ, Brar AK, Herter BN, Rankin A, Wylie KM. The plasma virome in longitudinal samples from pregnant patients. *Front Cell Infect Microbiol*. 2023;13:1061230. <https://doi.org/10.3389/fcimb.2023.1061230> PMID: 36844406
10. Kyathanahalli C, Snedden M, Singh L, Regalia C, Keenan-Devlin L, Borders AE, et al. Maternal plasma and salivary anelloviruses in pregnancy and preterm birth. *Front Med (Lausanne)*. 2023;10:1191938. <https://doi.org/10.3389/fmed.2023.1191938> PMID: 37396897
11. Morselli S, Foschi C, Laghi L, Zagonari S, Patuelli G, Camboni T, et al. Torquetenovirus in pregnancy: Correlation with vaginal microbiome, metabolome and pro-inflammatory cytokines. *Front Microbiol*. 2022;13:998849. <https://doi.org/10.3389/fmicb.2022.998849> PMID: 36160242

12. Tozetto-Mendoza TR, Bongiovanni AM, Minis E, Linhares IM, Boester A, Freire WS, et al. Torquetenovirus Titer in Vaginal Secretions from Pregnant and Postpartum Women: Association with Absence of *Lactobacillus crispatus* and Levels of Lactic Acid and Matrix Metalloproteinase-8. *Reprod Sci*. 2020;27(11):2075–81. <https://doi.org/10.1007/s43032-020-00227-1> PMID: [32944879](#)
13. Honorato L, Witkin SS, Mendes-Correa MC, Conde Toscano ALC, Linhares IM, de Paula AV, et al. The Torque Teno Virus Titer in Saliva Reflects the Level of Circulating CD4+ T Lymphocytes and HIV in Individuals Undergoing Antiretroviral Maintenance Therapy. *Front Med (Lausanne)*. 2022;8:809312. <https://doi.org/10.3389/fmed.2021.809312> PMID: [35096897](#)
14. Tarancon-Diez L, Carrasco I, Montes L, Falces-Romero I, Vazquez-Alejo E, Jiménez de Ory S, et al. Torque teno virus: a potential marker of immune reconstitution in youths with vertically acquired HIV. *Sci Rep*. 2024;14(1):24691. <https://doi.org/10.1038/s41598-024-73870-2> PMID: [39433755](#)
15. Dochnal SA, Francois AK, Cliffe AR. De Novo Polycomb Recruitment: Lessons from Latent Herpesviruses. *Viruses*. 2021;13(8):1470. <https://doi.org/10.3390/v13081470> PMID: [34452335](#)
16. Revello MG, Furione M, Rognoni V, Arossa A, Gerna G. Cytomegalovirus DNAemia in pregnant women. *J Clin Virol*. 2014;61(4):590–2. <https://doi.org/10.1016/j.jcv.2014.10.002> PMID: [25457128](#)
17. Barbosa NG, Yamamoto AY, Duarte G, Aragon DC, Fowler KB, Boppana S, et al. Cytomegalovirus Shedding in Seropositive Pregnant Women From a High-Seroprevalence Population: The Brazilian Cytomegalovirus Hearing and Maternal Secondary Infection Study. *Clin Infect Dis*. 2018;67(5):743–50. <https://doi.org/10.1093/cid/ciy166> PMID: [29490030](#)
18. Hutton J, Rowan PJ. Vertical Transmission and Discordance of Cytomegalovirus in Twin Pregnancies. *Front Cell Infect Microbiol*. 2021;11:676988. <https://doi.org/10.3389/fcimb.2021.676988> PMID: [34350131](#)
19. Dovrat S, Shabat A, Yahav-Dovrat A, Soufiev Z, Mendelson E, Kashi-Zaghdoun E, et al. Analysis of HSV1/2 Infection Reveals an Association between HSV-2 Reactivation and Pregnancy. *Viruses*. 2024;16(9):1370. <https://doi.org/10.3390/v16091370> PMID: [39339846](#)
20. Shi T-L, Huang L-J, Xiong Y-Q, Zhong Y-Y, Yang J-J, Fu T, et al. The risk of herpes simplex virus and human cytomegalovirus infection during pregnancy upon adverse pregnancy outcomes: A meta-analysis. *J Clin Virol*. 2018;104:48–55. <https://doi.org/10.1016/j.jcv.2018.04.016> PMID: [29729547](#)
21. Trombetta A, Comar M, Tommasini A, Canton M, Campisciano G, Zanotta N, et al. SARS-CoV-2 Infection and Inflammatory Response in a Twin Pregnancy. *Int J Environ Res Public Health*. 2021;18(6):3075. <https://doi.org/10.3390/ijerph18063075> PMID: [33802696](#)
22. Svirsky R, Rabbi ML, Hamad RA, Sharabi-Nov A, Kugler N, Galoyan N, et al. Vaccination in twin pregnancies: comparison between immunization before conception and during pregnancy. *Sci Rep*. 2024;14(1):10813. <https://doi.org/10.1038/s41598-024-61504-6> PMID: [38734805](#)
23. Morgan JC, Hynes GE, Pollard JM, Andrade MS, Jeong JC, Chong AS. Hyporesponsive fetus-specific T cell responses in multiparous human pregnancy. *Front Immunol*. 2025;16:1634430. <https://doi.org/10.3389/fimmu.2025.1634430> PMID: [40799654](#)
24. Silvano A, Sisti G, Seravalli V, Strambi N, Parenti A, Amedei A, et al. Changes in cytokine and sequestosome-1 levels during twin pregnancy progression: Association with outcome. *Cytokine*. 2024;180:156668. <https://doi.org/10.1016/j.cyto.2024.156668> PMID: [38851146](#)
25. Emery SL, Erdman DD, Bowen MD, Newton BR, Winchell JM, Meyer RF, et al. Real-time reverse transcription-polymerase chain reaction assay for SARS-associated coronavirus. *Emerg Infect Dis*. 2004;10(2):311–6. <https://doi.org/10.3201/eid1002.030759> PMID: [15030703](#)
26. Maggi F, Pistello M, Vatteroni M, Presciuttini S, Marchi S, Isola P, et al. Dynamics of persistent TT virus infection, as determined in patients treated with alpha interferon for concomitant hepatitis C virus infection. *J Virol*. 2001;75(24):11999–2004. <https://doi.org/10.1128/JVI.75.24.11999-12004.2001> PMID: [11711590](#)
27. Tozetto-Mendoza TR, da-Costa AC, Moron AF, Leal É, Lima SH, Ferreira NE, et al. Characterization of Torquetenovirus in amniotic fluid at the time of in utero fetal surgery: correlation with early premature delivery and respiratory distress. *Front Med (Lausanne)*. 2023;10:1161091. <https://doi.org/10.3389/fmed.2023.1161091> PMID: [37547599](#)
28. Lima LRP, da Silva AP, Schmidt-Chanasit J, de Paula VS. Diagnosis of human herpes virus 1 and 2 (HHV-1 and HHV-2): use of a synthetic standard curve for absolute quantification by real time polymerase chain reaction. *Mem Inst Oswaldo Cruz*. 2017;112(3):220–3. <https://doi.org/10.1590/0074-02760160354> PMID: [28225902](#)
29. Weidmann M, Armbruster K, Hufert FT. Challenges in designing a Taqman-based multiplex assay for the simultaneous detection of Herpes simplex virus types 1 and 2 and Varicella-zoster virus. *J Clin Virol*. 2008;42(4):326–34. <https://doi.org/10.1016/j.jcv.2008.03.005> PMID: [18439871](#)
30. Raposo JV, Alves ADR, Dos Santos da Silva A, Dos Santos DC, Melgaço JG, Moreira OC, et al. Multiplex qPCR facilitates identification of beta-herpesviruses in patients with acute liver failure of unknown etiology. *BMC Infect Dis*. 2019;19(1):773. <https://doi.org/10.1186/s12879-019-4309-4> PMID: [31484497](#)
31. Raposo JV, Sarmiento DJDS, Pinto RBDS, Lopes AO, Gallottini M, Tozetto-Mendoza TR, et al. Longitudinal study on oral shedding of human beta-herpesviruses 6 and 7 in renal transplant recipients reveals active replication. *J Oral Microbiol*. 2020;12(1):1785801. <https://doi.org/10.1080/20002297.2020.1785801> PMID: [32944150](#)
32. Fellner MD, Durand K, Rodriguez M, Irazu L, Alonio V, Picconi MA. Duplex realtime PCR method for Epstein-Barr virus and human DNA quantification: its application for post-transplant lymphoproliferative disorders detection. *Braz J Infect Dis*. 2014;18(3):271–80. <https://doi.org/10.1016/j.bjid.2013.07.011> PMID: [24389276](#)
33. Krishnan HH, Naranatt PP, Smith MS, Zeng L, Bloomer C, Chandran B. Concurrent expression of latent and a limited number of lytic genes with immune modulation and antiapoptotic function by Kaposi's sarcoma-associated herpesvirus early during infection of primary endothelial and

- p>fibroblast cells and subsequent decline of lytic gene expression.
- J Virol*
- . 2004;78(7):3601–20.
- <https://doi.org/10.1128/jvi.78.7.3601-3620.2004>
- PMID:
- [15016882](#)
34. Tourinho RS. Application of Synthetic Standard Curves for Absolute Quantification of Hepatitis A and E by Real-Time PCR. *J Genet Genome Res*. 2015;2(1). <https://doi.org/10.23937/2378-3648/1410013>
35. Pellett PE, Ablashi DV, Ambros PF, Agut H, Caserta MT, Descamps V, et al. Chromosomally integrated human herpesvirus 6: questions and answers. *Rev Med Virol*. 2012;22(3):144–55. <https://doi.org/10.1002/rmv.715> PMID: [22052666](#)
36. Sloan P, Rodriguez C, Bedell BA, Murray J, Dagle J, Ryckman K, et al. Alphatorquevirus is the most prevalent virus identified in blood from a matched maternal-infant preterm cohort. *J Matern Fetal Neonatal Med*. 2022;35(9):1636–42. <https://doi.org/10.1080/14767058.2020.1763298> PMID: [32401076](#)
37. Eldem V, Kuralay SC, Özdoğan G, Özçelik GH, Aydın D, Çakmak G, et al. Comprehensive analysis of circulating viral DNA in maternal plasma at population-scale using low-pass whole-genome sequencing. *Genomics*. 2023;115(2):110556. <https://doi.org/10.1016/j.ygeno.2022.110556> PMID: [36599399](#)
38. Dahl H, Fjaertoft G, Norsted T, Wang FZ, Mousavi-Jazi M, Linde A. Reactivation of human herpesvirus 6 during pregnancy. *J Infect Dis*. 1999;180(6):2035–8. <https://doi.org/10.1086/315115> PMID: [10558965](#)
39. Perni SC, Kalish RB, Hutson JM, Karasahin E, Bongiovanni AM, Ratushny V, et al. Differential expression of immune system-related components in midtrimester amniotic fluid from singleton and twin pregnancies. *Am J Obstet Gynecol*. 2005;193(3 Pt 2):942–6. <https://doi.org/10.1016/j.ajog.2005.05.081> PMID: [16157091](#)
40. Miura H, Yoshikawa T. Inherited Chromosomally Integrated HHV-6: Diagnosis and Clinical Features. *Pediatr Infect Dis J*. 2025;44(9):e322–8. <https://doi.org/10.1097/INF.0000000000004890> PMID: [40472254](#)
41. Pantry SN, Medveczky PG. Latency, Integration, and Reactivation of Human Herpesvirus-6. *Viruses*. 2017;9(7):194. <https://doi.org/10.3390/v9070194> PMID: [28737715](#)
42. Liu S, Huang S, Chen F, Zhao L, Yuan Y, Francis SS, et al. Genomic Analyses from Non-invasive Prenatal Testing Reveal Genetic Associations, Patterns of Viral Infections, and Chinese Population History. *Cell*. 2018;175(2):347–359.e14. <https://doi.org/10.1016/j.cell.2018.08.016> PMID: [30290141](#)
43. Silasi M, Cardenas I, Kwon J-Y, Racicot K, Aldo P, Mor G. Viral infections during pregnancy. *Am J Reprod Immunol*. 2015;73(3):199–213. <https://doi.org/10.1111/aji.12355> PMID: [25582523](#)
44. Clark DA, Ward KN. Importance of chromosomally integrated HHV-6A and -6B in the diagnosis of active HHV-6 infection. *Herpes*. 2008;15(2):28–32. PMID: [19856545](#)
45. Hall CB, Caserta MT, Schnabel K, Shelley LM, Marino AS, Carnahan JA, et al. Chromosomal integration of human herpesvirus 6 is the major mode of congenital human herpesvirus 6 infection. *Pediatrics*. 2008;122(3):513–20. <https://doi.org/10.1542/peds.2007-2838> PMID: [18762520](#)
46. Machuca I, Aguado R, Veloza L, Marcos MÁ. Absence of maternal HHV-6-specific T-cell response in the setting of human Herpesvirus-6 chromosomal integration: Potential impact on congenital infection. *Enferm Infecc Microbiol Clin (Engl Ed)*. 2021;39(2):104–6. <https://doi.org/10.1016/j.eimc.2020.04.003> PMID: [32439137](#)
47. Nasioudis D, Forney LJ, Schneider GM, Gliniewicz K, France M, Boester A, et al. Influence of Pregnancy History on the Vaginal Microbiome of Pregnant Women in their First Trimester. *Sci Rep*. 2017;7(1):10201. <https://doi.org/10.1038/s41598-017-09857-z> PMID: [28860491](#)
